# Supplementary material for: Simultaneous extraction and preconcentration of some metal ions using eucalyptus-wood based activated carbon modified with silver hydroxide nanoparticles and a chelating agent: optimization by an experimental design
Source: Royal Society of Chemistry journal article supplement (doi:10.1039/c5ra14005f), 2015-01-01
Supplement: c5ra14005f1.pdf [file c5ra14005f1.pdf]

**Table S1.** CCD for four independent variables involved in adsorption step with the respectively observed responses.

| Run | Factors |       |      |   | Extraction (%)   |                  |                  |                  |                  |                  |
|-----|---------|-------|------|---|------------------|------------------|------------------|------------------|------------------|------------------|
|     | A       | B     | C    | D | Pb <sup>2+</sup> | Cd <sup>2+</sup> | Co <sup>2+</sup> | Cu <sup>2+</sup> | Cr <sup>3+</sup> | Ni <sup>2+</sup> |
| 1   | 0.125   | 0.032 | 2.13 | 7 | 89               | 75               | 77               | 72               | 73               | 58               |
| 2   | 0.100   | 0.024 | 1.75 | 6 | 98               | 91               | 56               | 60               | 75               | 98               |
| 3   | 0.125   | 0.016 | 1.38 | 5 | 88               | 79               | 58               | 70               | 96               | 84               |
| 4   | 0.075   | 0.032 | 1.38 | 7 | 83               | 76               | 36               | 45               | 55               | 61               |
| 5   | 0.100   | 0.024 | 1.75 | 6 | 99               | 90               | 56               | 61               | 76               | 88               |
| 6   | 0.100   | 0.024 | 1.75 | 8 | 80               | 53               | 27               | 30               | 45               | 49               |
| 7   | 0.100   | 0.024 | 2.50 | 6 | 82               | 80               | 42               | 46               | 62               | 70               |
| 8   | 0.075   | 0.032 | 2.13 | 5 | 79               | 68               | 22               | 49               | 57               | 59               |
| 9   | 0.100   | 0.040 | 1.75 | 6 | 94               | 89               | 69               | 84               | 77               | 89               |
| 10  | 0.075   | 0.016 | 2.13 | 5 | 73               | 61               | 14               | 20               | 50               | 91               |
| 11  | 0.125   | 0.016 | 2.13 | 7 | 82               | 69               | 47               | 43               | 68               | 53               |
| 12  | 0.125   | 0.032 | 1.38 | 5 | 95               | 82               | 85               | 99               | 97               | 89               |
| 13  | 0.075   | 0.016 | 1.38 | 7 | 78               | 64               | 13               | 15               | 55               | 50               |
| 14  | 0.100   | 0.024 | 1.75 | 4 | 80               | 62               | 29               | 53               | 67               | 75               |
| 15  | 0.100   | 0.008 | 1.75 | 6 | 78               | 75               | 25               | 29               | 73               | 80               |
| 16  | 0.100   | 0.024 | 1.75 | 6 | 98               | 91               | 57               | 60               | 57               | 79               |
| 17  | 0.125   | 0.016 | 2.13 | 5 | 80               | 72               | 52               | 55               | 83               | 77               |
| 18  | 0.150   | 0.024 | 1.75 | 6 | 87               | 74               | 93               | 86               | 99               | 69               |
| 19  | 0.100   | 0.024 | 1.75 | 6 | 99               | 92               | 56               | 60               | 74               | 89               |
| 20  | 0.075   | 0.016 | 2.13 | 7 | 75               | 55               | 9                | 12               | 36               | 32               |
| 21  | 0.125   | 0.032 | 1.38 | 7 | 93               | 79               | 90               | 83               | 85               | 92               |
| 22  | 0.075   | 0.032 | 2.13 | 7 | 80               | 68               | 27               | 39               | 42               | 36               |
| 23  | 0.100   | 0.024 | 1.00 | 6 | 95               | 94               | 60               | 65               | 85               | 98               |
| 24  | 0.100   | 0.024 | 1.75 | 6 | 99               | 91               | 57               | 61               | 75               | 89               |
| 25  | 0.125   | 0.016 | 1.38 | 7 | 89               | 71               | 55               | 54               | 88               | 72               |
| 26  | 0.075   | 0.016 | 1.38 | 5 | 80               | 78               | 20               | 30               | 62               | 70               |
| 27  | 0.125   | 0.032 | 2.13 | 5 | 89               | 75               | 72               | 82               | 89               | 70               |
| 28  | 0.050   | 0.024 | 1.75 | 6 | 68               | 57               | 2                | 17               | 40               | 42               |
| 29  | 0.075   | 0.032 | 1.38 | 5 | 85               | 83               | 35               | 60               | 66               | 74               |
| 30  | 0.100   | 0.024 | 1.75 | 5 | 99               | 92               | 56               | 60               | 75               | 88               |

**Table S2.** CCD for three independent variables involved in desorption step with the respectively observed responses.

| Run | Factors |      |      | % Recovery       |                  |                  |                  |                  |                  |
|-----|---------|------|------|------------------|------------------|------------------|------------------|------------------|------------------|
|     | A       | B    | C    | Pb <sup>2+</sup> | Cd <sup>2+</sup> | Co <sup>2+</sup> | Cu <sup>2+</sup> | Cr <sup>3+</sup> | Ni <sup>2+</sup> |
| 1   | 4.49    | 6.00 | 1.45 | 74               | 73               | 59               | 88               | 56               | 64               |
| 2   | 7.00    | 3.49 | 1.45 | 92               | 90               | 75               | 45               | 75               | 72               |
| 3   | 4.49    | 3.49 | 1.45 | 71               | 70.5             | 61               | 45               | 40               | 41               |
| 4   | 5.98    | 4.98 | 0.90 | 99               | 99               | 94               | 93               | 99               | 97               |
| 5   | 5.98    | 2.00 | 0.90 | 82               | 80               | 71               | 39               | 60               | 60               |
| 6   | 4.49    | 3.49 | 0.53 | 85               | 89               | 84               | 70               | 57               | 60               |
| 7   | 4.49    | 3.49 | 2.38 | 55               | 53               | 30               | 27               | 17               | 20               |
| 8   | 3.00    | 2.00 | 0.90 | 55               | 51               | 43               | 24               | 4                | 14               |
| 9   | 3.00    | 2.00 | 2.00 | 40               | 30               | 20               | 5                | 3                | 8                |
| 10  | 4.49    | 3.49 | 1.45 | 72               | 72               | 60               | 46               | 41               | 40               |
| 11  | 1.98    | 3.49 | 1.45 | 49               | 47               | 30               | 26               | 7                | 7                |
| 12  | 4.49    | 3.49 | 1.45 | 72               | 70               | 61               | 44               | 39               | 39               |
| 13  | 4.49    | 3.49 | 1.45 | 72               | 71               | 61               | 45               | 40               | 41               |
| 14  | 3.00    | 4.98 | 2.00 | 51               | 50               | 27               | 45               | 20               | 25               |
| 15  | 4.49    | 0.98 | 1.45 | 50               | 44               | 35               | 10               | 10               | 15               |
| 16  | 3.00    | 4.98 | 0.90 | 72               | 72               | 64               | 76               | 37               | 38               |
| 17  | 5.98    | 2.00 | 2.00 | 63               | 60               | 40               | 13               | 24               | 20               |
| 18  | 4.49    | 3.49 | 1.45 | 71               | 70               | 60               | 45               | 41               | 40               |
| 19  | 4.49    | 3.49 | 1.45 | 72               | 71               | 60               | 45               | 40               | 40               |
| 20  | 5.98    | 4.98 | 2.00 | 78               | 76               | 53               | 59               | 51               | 63               |
